# Supplementary material for: Synthesis, kinetic studies, and atom transfer reactivity of [2Fe–2E] model compounds
Source: Royal Society of Chemistry journal article supplement (doi:10.1039/d3qi00728f), 2023-01-01
Supplement: d3qi00728f1.pdf [file d3qi00728f1.pdf]

## Supplementary Information

### Synthesis, Kinetic Studies, and Atom Transfer

### Reactivity of [2Fe-2E] (E = S, Se) Model

### Compounds

*Erwin A. Weerawardhana,<sup>a</sup> Matthias Zeller,<sup>b</sup> Wei-Tsung Lee<sup>\*a</sup>*

<sup>a</sup> Department of Chemistry and Biochemistry, Loyola University Chicago, Chicago, Illinois 60660, United States.

<sup>b</sup> Department of Chemistry, Purdue University, West Lafayette, IN 47907, United States.

## Table of Contents

|                                                                                                                                                                                                                                                                                                                                                                                                  | Page |
|--------------------------------------------------------------------------------------------------------------------------------------------------------------------------------------------------------------------------------------------------------------------------------------------------------------------------------------------------------------------------------------------------|------|
| <b>Table S1.</b> Crystal data and structure refinement details for <b>1</b> and <b>2</b> .                                                                                                                                                                                                                                                                                                       | S3   |
| <b>Figure S1.</b> Front-view (along Fe···Fe axis) and side-view of truncated [2Fe-2S] model compounds <b>1</b> (red), <b>3</b> (green), <b>4</b> (magenta), and <b>5</b> (cyan) supported by $\beta$ -diketiminato ligands.                                                                                                                                                                      | S4   |
| <b>Figure S2.</b> Overlaid cyclic voltammograms of <b>2</b> (1mM) in THF with 0.1 M N(Bu) <sub>4</sub> PF <sub>6</sub> . Scan rates = 50, 100, 200, 300, 400, 500 mV/s referenced to a ferrocene/ferrocenium redox couple ( <i>Fc</i> ). Inset: Plot of cathodic peak current (●, R <sup>2</sup> = 0.9911) and anodic peak current (◆, R <sup>2</sup> = 0.9834) versus square root of scan rate. | S4   |
| <b>Figure S3.</b> UV–vis spectra of 0.1 mM <b>1</b> (—) and <b>2</b> (—) in THF.                                                                                                                                                                                                                                                                                                                 | S5   |
| <b>Figure S4.</b> Reduction of 0.1 mM <b>2</b> in THF by addition of CoCp* <sub>2</sub> in increments of 0.25 equiv as monitored by UV–vis spectroscopy (path length, 1.0 cm). Inset: Corresponding changes of the absorbance at 396 (◆) and 614 (●) nm.                                                                                                                                         | S5   |
| <b>Figure S5.</b> Plot of observed pseudo-first order rate constants, $k_{\text{obs}}$ , versus concentration of <sup>32</sup> S <sub>8</sub> at 25 °C. The slope corresponds to the second-order rate constants.                                                                                                                                                                                | S6   |
| <b>Figure S6.</b> Plot of observed pseudo-first order rate constants, $k_{\text{obs}}$ , versus concentration of <sup>34</sup> S <sub>8</sub> at 25 °C. The slope corresponds to the second-order rate constants.                                                                                                                                                                                | S6   |
| <b>Figure S7.</b> Eyring plot for the formation of <b>1</b> by treating (L1)Fe(cod) with <sup>32</sup> S <sub>8</sub> to in toluene.                                                                                                                                                                                                                                                             | S7   |
| <b>Scheme S1.</b> The proposed catalytic cycle of S atom transfer reaction in the presence of (L1)Fe(cod) and excess S <sub>8</sub> and PPh <sub>3</sub>                                                                                                                                                                                                                                         | S7   |
| <b>Figure S8.</b> <sup>1</sup> H NMR spectrum of <b>1</b> in C <sub>6</sub> D <sub>6</sub> .                                                                                                                                                                                                                                                                                                     | S8   |
| <b>Figure S9.</b> <sup>1</sup> H NMR spectrum of <b>2</b> in C <sub>6</sub> D <sub>6</sub> .                                                                                                                                                                                                                                                                                                     | S9   |
| <b>Figure S10.</b> IR spectrum of <b>1</b> .                                                                                                                                                                                                                                                                                                                                                     | S9   |
| <b>Reference</b>                                                                                                                                                                                                                                                                                                                                                                                 | S10  |

**Table S1.** Crystal data and structure refinement details for **1** and **2**.

|                                                | <b>1</b>                                                                       | <b>2</b>                                                                       |
|------------------------------------------------|--------------------------------------------------------------------------------|--------------------------------------------------------------------------------|
| Empirical formula                              | C <sub>50</sub> H <sub>65</sub> Fe <sub>2</sub> N <sub>4</sub> Se <sub>2</sub> | C <sub>50</sub> H <sub>65</sub> Fe <sub>2</sub> N <sub>4</sub> Se <sub>2</sub> |
| Formula weight                                 | 898.89                                                                         | 991.68                                                                         |
| Space group                                    | <i>P</i> 2 <sub>1</sub> 2 <sub>1</sub> 2 <sub>1</sub>                          | <i>P</i> 2 <sub>1</sub>                                                        |
| <i>a</i> /Å                                    | 13.6176(8)                                                                     | 10.2202(5)                                                                     |
| <i>b</i> /Å                                    | 16.6881(9)                                                                     | 18.5554(8)                                                                     |
| <i>c</i> /Å                                    | 21.1555(10)                                                                    | 13.4719(5)                                                                     |
| <i>a</i> /°                                    | 90                                                                             | 90                                                                             |
| <i>b</i> /°                                    | 90                                                                             | 111.726(3)                                                                     |
| <i>g</i> /°                                    | 90                                                                             | 90                                                                             |
| <i>V</i> /Å <sup>3</sup>                       | 4807.6                                                                         | 2373.33(18)                                                                    |
| <i>Z</i>                                       | 4                                                                              | 2                                                                              |
| <i>D</i> <sub>calcd</sub> , g cm <sup>-3</sup> | 1.242                                                                          | 1.388                                                                          |
| <i>F</i> (000)                                 | 1912.0                                                                         | 1026.0                                                                         |
| Temp, K                                        | 100                                                                            | 100                                                                            |
| <i>R</i> ( <i>F</i> ), %                       | 6.95                                                                           | 5.93                                                                           |
| <i>R</i> <sub>w</sub> ( <i>F</i> ), %          | 17.26                                                                          | 14.01                                                                          |

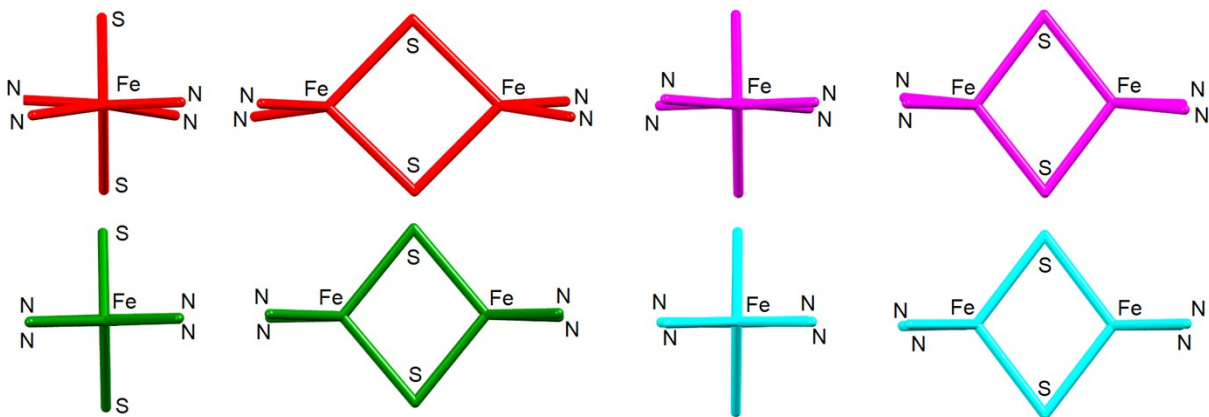

**Figure S1.** Front-view (along Fe···Fe axis) and side-view of truncated [2Fe-2S] model compounds **1** (red), **3** (green), **4** (magenta), and **5** (cyan) supported by  $\beta$ -diketimate ligands.

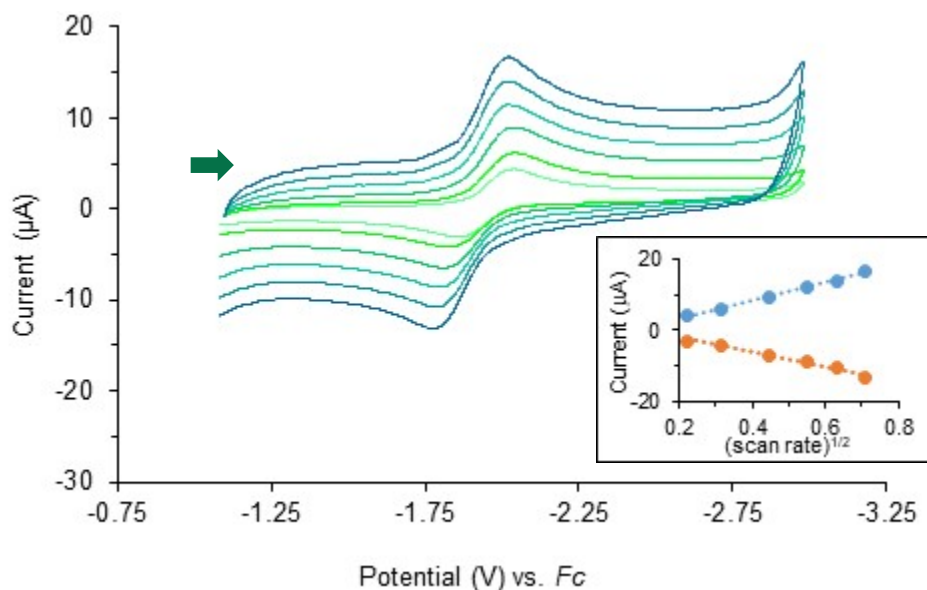

**Figure S2.** Overlaid cyclic voltammograms of **2** (1mM) in THF with 0.1 M  $N(Bu)_4PF_6$ . Scan rates = 50, 100, 200, 300, 400, 500 mV/s referenced to a ferrocene/ferrocenium redox couple ( $Fc$ ). Inset: Plot of cathodic peak current ( $\bullet$ ,  $R^2 = 0.9911$ ) and anodic peak current ( $\blacklozenge$ ,  $R^2 = 0.9834$ ) versus square root of scan rate.

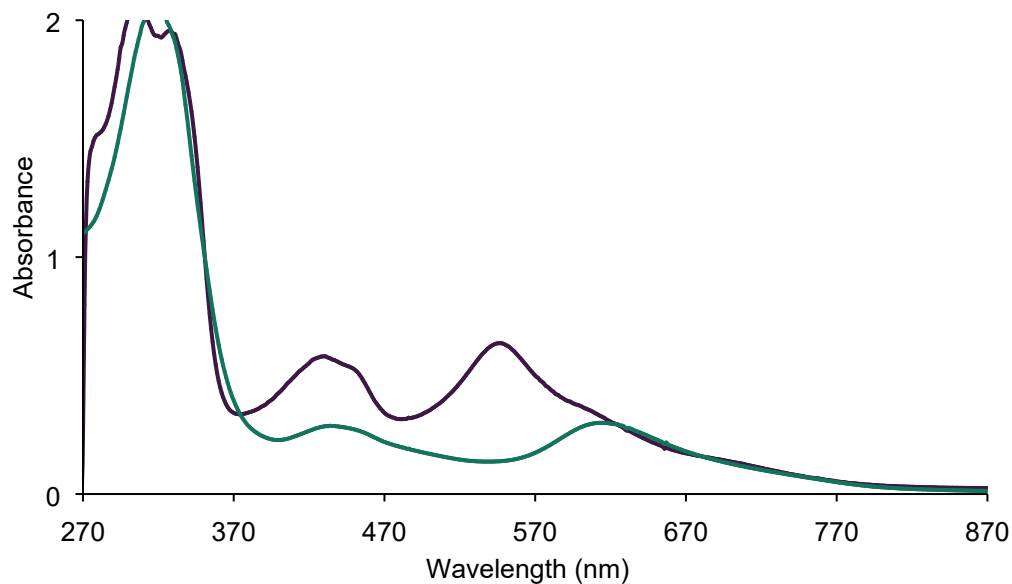

**Figure S3.** UV-vis spectra of 0.1 mM **1** (—) and **2** (—) in THF.

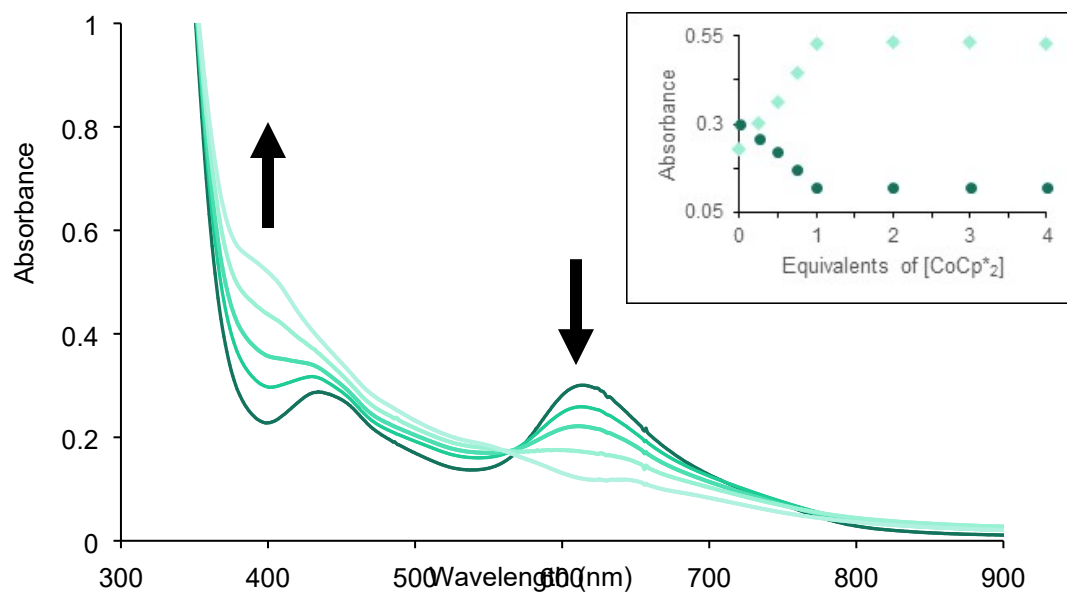

**Figure S4.** Reduction of 0.1 mM **2** in THF by addition of CoCp\*<sub>2</sub> in increments of 0.25 equiv as monitored by UV-vis spectroscopy (path length, 1.0 cm). Inset: Corresponding changes of the absorbance at 396 (◆) and 614 (●) nm.

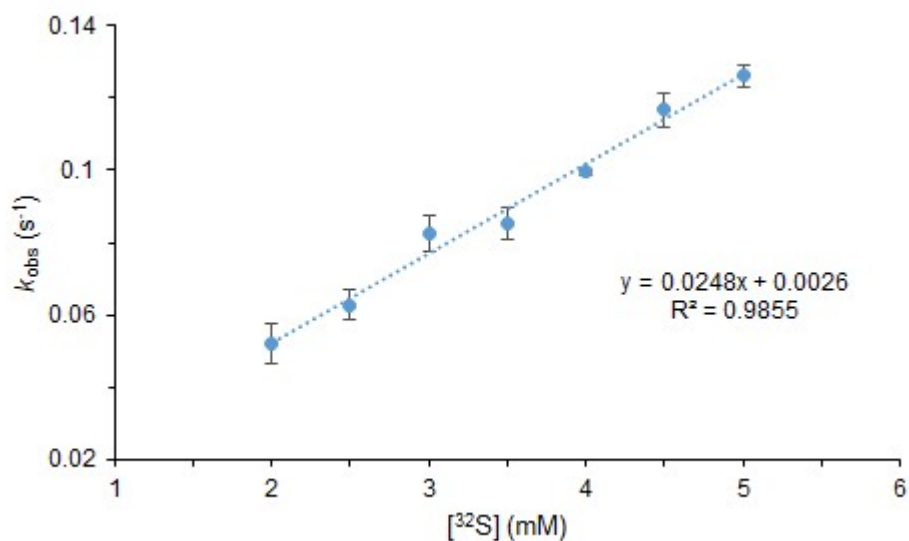

**Figure S5.** Plot of observed pseudo-first order rate constants,  $k_{\text{obs}}$ , versus concentration of  $^{32}\text{S}_8$  at 25 °C. The slope corresponds to the second-order rate constants.

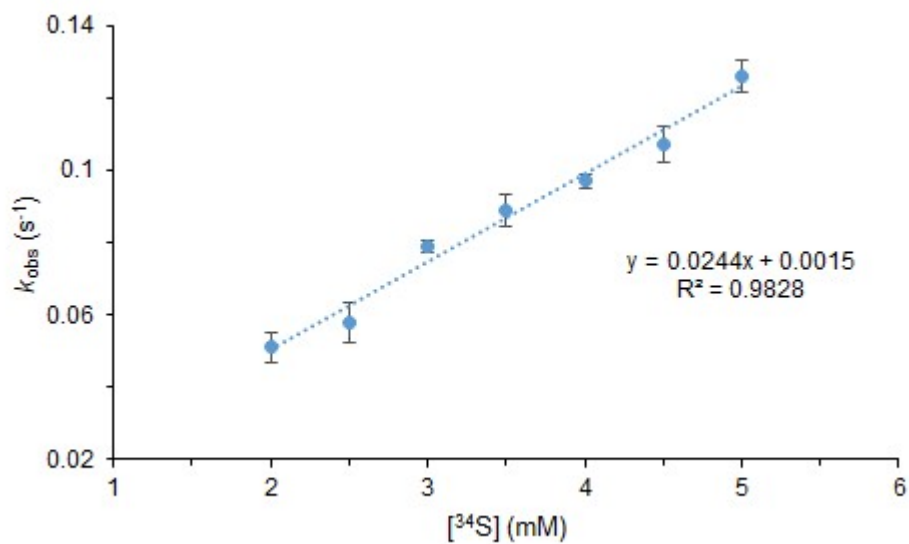

**Figure S6.** Plot of observed pseudo-first order rate constants,  $k_{\text{obs}}$ , versus concentration of  $^{34}\text{S}_8$  at 25 °C. The slope corresponds to the second-order rate constants.

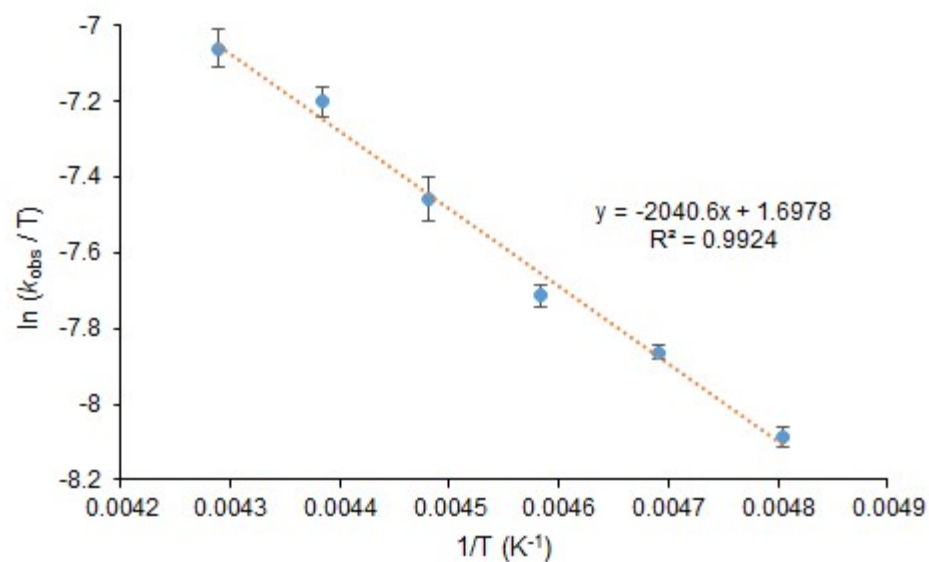

**Figure S7.** Eyring plot for the formation of **1** by treating **(L1)Fe(cod)** with  $^{32}\text{S}_8$  to in toluene.

**Scheme S1.** The proposed catalytic cycle of S atom transfer reaction in the presence of **(L1)Fe(cod)** and excess  $\text{S}_8$  and  $\text{PPh}_3$ . Note: **(L1)Fe(cod)** does not convert to **A** in the presence of 10 equiv of  $\text{PPh}_3$  according to the reaction monitored by  $^1\text{H}$  NMR spectroscopy.

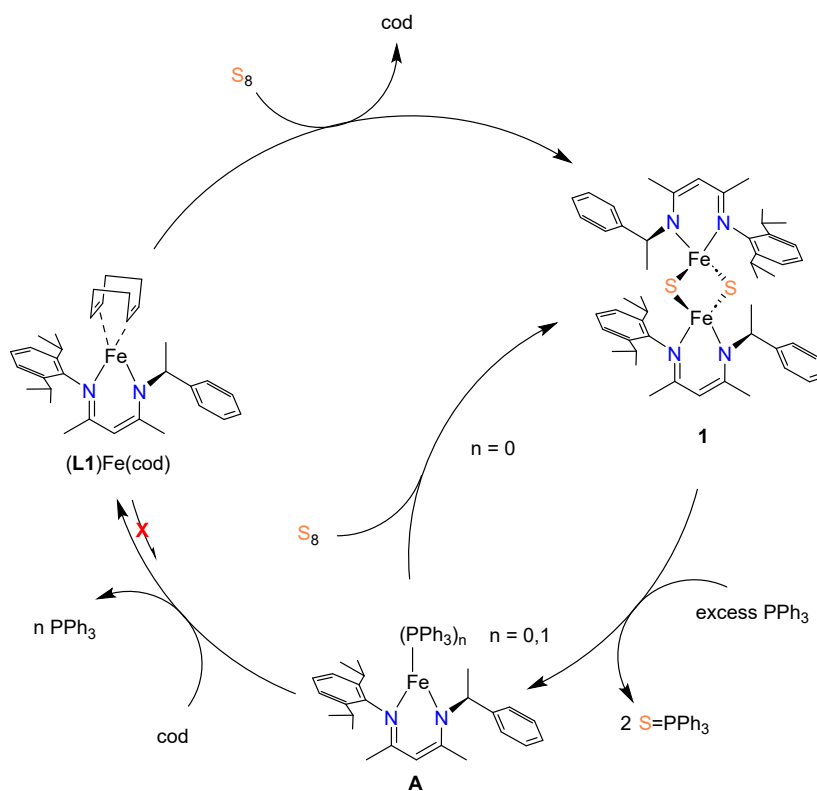

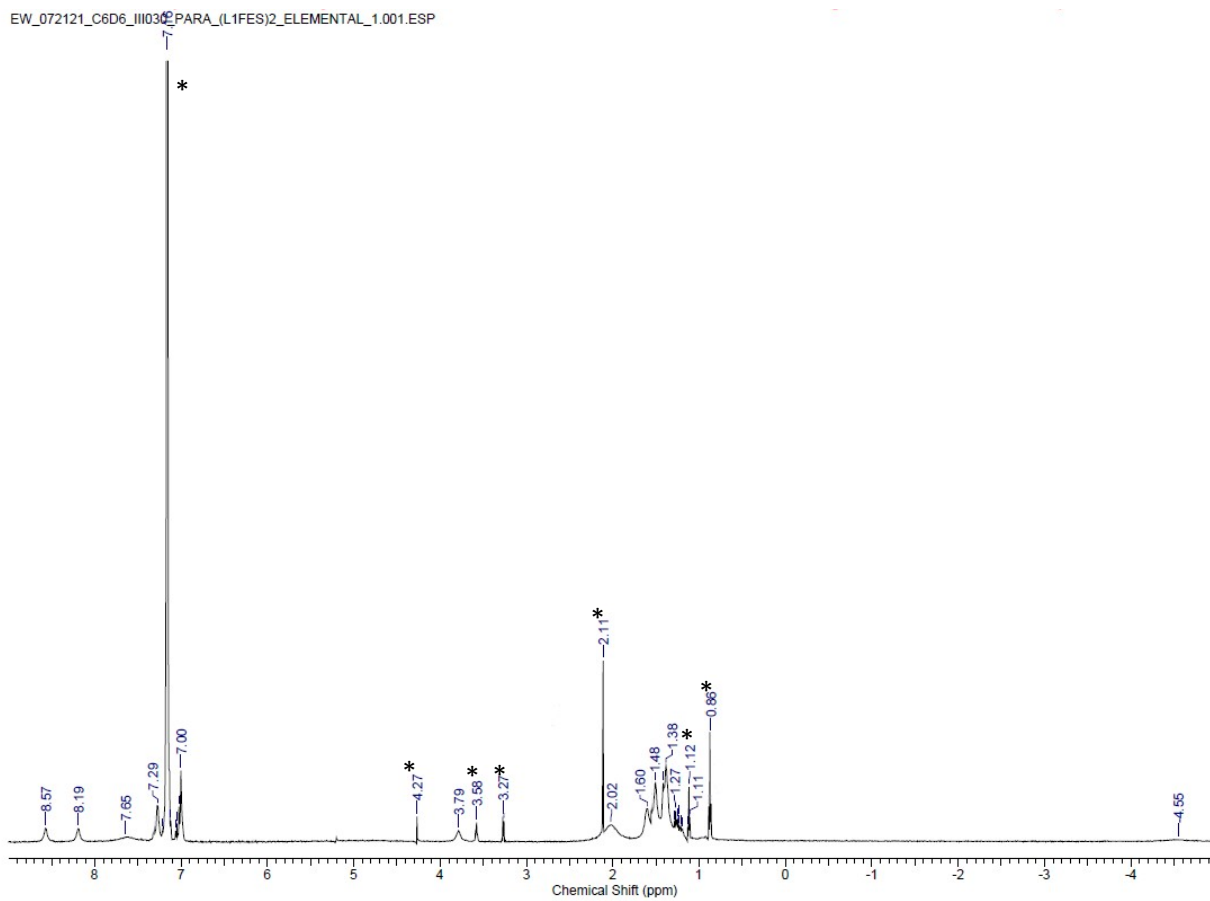

**Figure S8.** <sup>1</sup>H NMR spectrum of **1** in C<sub>6</sub>D<sub>6</sub>. \* solvent residual peaks (δ): DCM (4.27), THF (3.85), Et<sub>2</sub>O (3.27, 1.12), toluene (2.11), and n-pentane (0.86).<sup>1</sup>



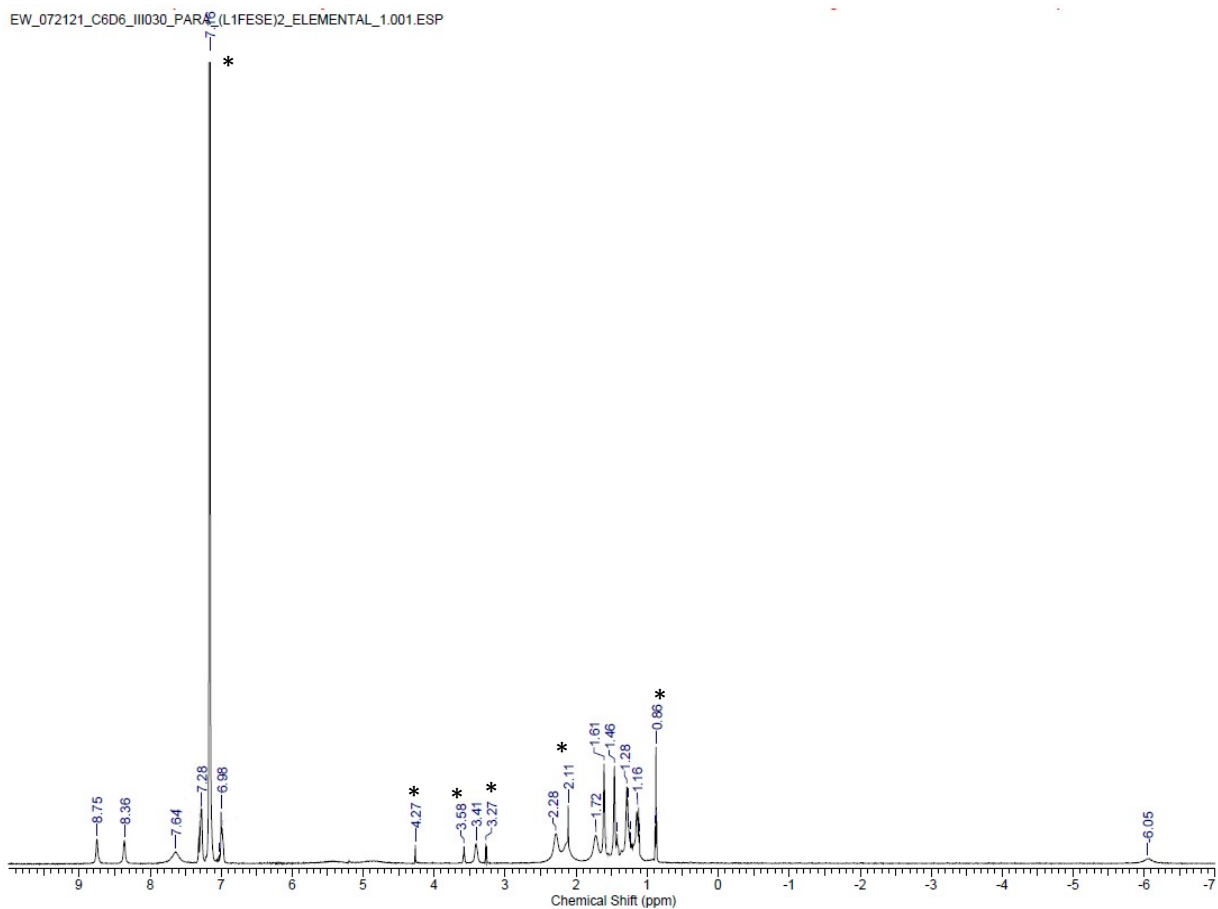

**Figure S9.**  $^1\text{H}$  NMR spectrum of **2** in  $\text{C}_6\text{D}_6$ . \* solvent residual peaks ( $\delta$ ): DCM (4.27), THF (3.85),  $\text{Et}_2\text{O}$  (3.27), toluene (2.11), and n-pentane (0.86).<sup>1</sup>

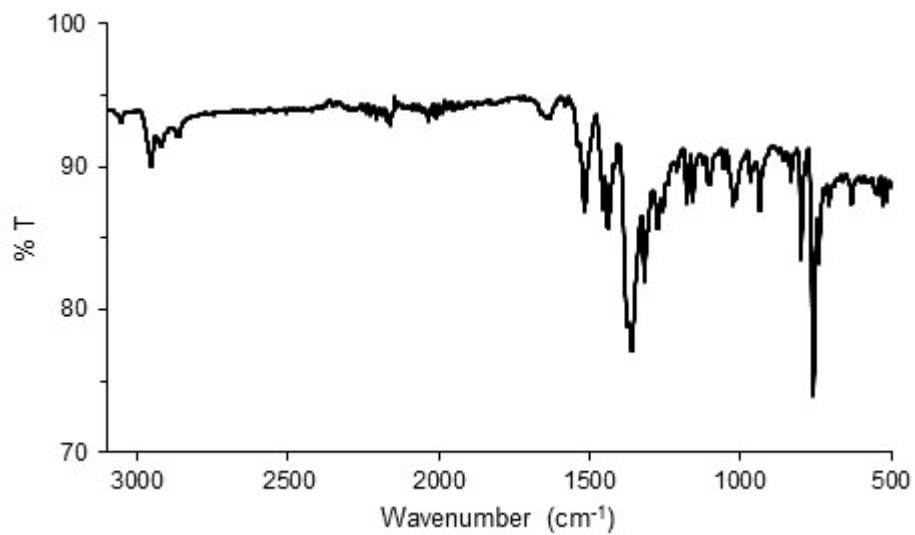

**Figure S10.** IR spectrum of **1**.

**Reference:**

1. Fulmer, G. R.; Miller, A. J. M.; Sherden, N. H.; Gottlieb, H. E.; Nudelman, A.; Stoltz, B. M.; Bercaw, J. E.; Goldberg, K. I. *Organometallics* 2010, **29**, 2176–2179.
